# Supplementary material for: Dual Function Modification of Cs2CO3 for Efficient Perovskite Solar Cells
Source: MDPI journal article supplement (doi:10.3390/nano12183144), 2022-09-10
Supplement: s1 [file s1]

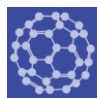

# Dual Function Modification of $\text{Cs}_2\text{CO}_3$ for Efficient Perovskite Solar Cells

Debei Liu <sup>1,2,\*</sup>, Qingxin Zeng <sup>1</sup>, Cunyun Xu <sup>1</sup>, Hongfei Liang <sup>3</sup>, Lijia Chen <sup>4</sup> and Qunliang Song <sup>1,\*</sup>

<sup>1</sup> Institute for Clean Energy & Advanced Materials, Faculty of Materials and Energy, Southwest University, Chongqing 400715, China

<sup>2</sup> Chongqing Yufu Holding Group Co., Ltd., Chongqing 400715, China

<sup>3</sup> College of International Studies, Southwest University, Chongqing 400715, China

<sup>4</sup> College of Physics and Electronics Engineering, Chongqing Normal University, Chongqing 401331, China

\* Correspondence: dbliu1992@foxmail.com (D.L.); qlsong@swu.edu.cn (Q.S.)

## Note 1

### Method

**Materials.** All materials used in the experiments are commercially available materials. Materials used to prepare perovskite films, including lead iodide ( $\text{PbI}_2$ ), methylammonium iodide (MAI), formamidinium Iodide (FAI) were bought from Xi'an Polymer Light Technology Corporation (Xi'an, China). The material used to prepare the device, [6,6]-phenyl-C61-butyric acid methyl ester (PCBM), Poly(3,4-ethylenedioxythiophene) polystyrene sulfonate (PEDOT:PSS) and 2,2',7,7'-Tetrakis[N,N-di(4-methoxy-phenyl)amino]-9,9'-spirobifluorene (Spiro-OMeTAD) were also purchased from Xi'an Polymer Light Technology Corporation. Tin (IV) oxide, 15% in  $\text{H}_2\text{O}$  colloidal dispersion used to prepare  $\text{SnO}_2$  film was obtained from Thermo Fisher Scientific (Shanghai, China). Cesium carbonate ( $\text{Cs}_2\text{CO}_3$ ) was purchased from Sigma-Aldrich (Darmstadt, Germany). The solvents used in the experiments, including N,N-Dimethylformamide (DMF), dimethyl sulfoxide (DMSO), isopropanol (IPA), and chlorobenzene (CB), were all obtained from J&K Scientific Ltd (Newark, Germany).

**Device fabrication.** The structure of the perovskite solar cells used in this work is ITO/ (with or without)  $\text{Cs}_2\text{CO}_3/\text{SnO}_2/\text{FA}_{0.9}\text{MA}_{0.1}\text{PbI}_3/\text{Spiro-OMeTAD}/\text{Ag}$ , and the device was fabricated according to the following procedure. The first step is the cleaning of the ITO substrate, which is sequentially cleaned by a mild detergent of Decon 90, the distilled water and the ethanol in ultrasonic machine (KQ3200DV, Shumei, Kunshan, China), followed by drying with nitrogen flow. In the second step, for  $\text{Cs}_2\text{CO}_3$  modified devices, the  $\text{Cs}_2\text{CO}_3$  film is spin-coated on ITO at a speed of 3000 rpm. The third step is to spin-coat the film with  $\text{SnO}_2$  solution diluted to 7.5% weight ratio at 4000 rpm, and anneal the spin-coated  $\text{SnO}_2$  film at 150 °C for 30 min. The fourth step is to spin-coat the lead iodide ( $\text{PbI}_2$ ) layer. 645.414 mg of  $\text{PbI}_2$  is dissolved in a mixture of 800  $\mu\text{L}$  of DMF and 200  $\mu\text{L}$  of DMSO, and then spin coated onto the  $\text{SnO}_2$  layer at 4000 rpm. The fifth step is to spin-coat  $\text{FA}_{0.9}\text{MA}_{0.1}\text{I}$  solution on the  $\text{PbI}_2$  film at 1700 rpm, where  $\text{FA}_{0.9}\text{MA}_{0.1}\text{I}$  solution is obtained by dissolving 45 mg FAI and 5 mg MAI in 1 mL IPA. The sixth step is to wash the wet film mixture of  $\text{FA}_{0.9}\text{MA}_{0.1}\text{I}$  solution and  $\text{PbI}_2$  with IPA, and take 200  $\mu\text{L}$  of IPA quickly to drip when the mixed film is spun to 4000 rpm. For devices that require repeated  $\text{FA}_{0.9}\text{MA}_{0.1}\text{I}$  solution, repeat steps 4 and 5. After that, the mixed film is annealed at 60 °C for 30 min, and the preparation of the perovskite film was completed. The seventh step is to spin-coat the Spiro-OMeTAD film. The used solution is dissolved 72.5 mg Spiro-OMeTAD in 1 mL CB with appropriate additives as reported in the previous literature [17]. The spin-coated Spiro-OMeTAD film needs to be oxidized in an electronic drying oven for more than 12 h. Finally, a 100 nm thick Ag electrode is evaporated to complete the device fabrication.

The preparation of samples without perovskite layer with the structure of ITO/ (with or without)  $\text{Cs}_2\text{CO}_3/\text{SnO}_2/\text{PEDOT:PSS}/\text{MoO}_3/\text{Ag}$  is fabricated according to the following process. First, clean the ITO substrate. Second, spin-coat the  $\text{Cs}_2\text{CO}_3$  solution on ITO at a speed of 3000 rpm. Third, spin-coat the film with  $\text{SnO}_2$  solution and anneal it at 150 °C for 30 min. Fourth, spin-coat PEDOT:PSS at a speed of 6000 rpm. Fifth, deposit 10 nm thick  $\text{MoO}_3$  layer. Finally, a 100 nm thick Ag electrode is deposited.

Characterization. The SEM image in this paper was obtained by scanning electron microscopy (JSM-6700F, Tokyo, Japan). The current-voltage characteristics curves were taken from Keithley 2400 source meter under illumination of  $100 \text{ mW}\cdot\text{cm}^{-2}$  simulated light from a Newport simulator (model 94043A, Bozeman, Malta) with a scan window from 1.2 to -1.2 V (reverse) or -1.2 to 1.2 V (forward) with a voltage step of 10 mV and 0 ms delay time. The stabilized photocurrent measurement at the maximum power point was tested with Keithley by continuously recording current at a certain bias voltage. The EQE test was performed by an assembled system consisting of a Xenon arc lamp (Newport, 350 W, 66902, Bozeman, Malta) as a light source, a monochromatic instrument (Newport, 74125, Bozeman, Malta) as spectrometer, and a lock-in amplifier (Newport, 70104, Bozeman, Malta) for signal collection. The UV-Vis transmission spectra were acquired using Shimadzu UV-2550 Spectrophotometer (Kyoto, Japan). The transient photocurrent/photovoltage decay (TPC/TPV) measurements were conducted with a home-built equipment as described in reference [18].

## Note 2

The optical field distribution in the device was simulated using OPTICAL software (Version 2, Boston, MA, USA), and the device structure is Air/glass (700,000 nm)/ $\text{SiO}_2$  (30 nm)/ITO (135 nm)/ $\text{SnO}_2$  ( $\text{Cs}_2\text{CO}_3/\text{SnO}_2$ ) ( $\text{SnO}_2$  for 45 nm and  $\text{Cs}_2\text{CO}_3/\text{SnO}_2$  for 50 nm) /perovskite (600 nm)/Spiro-OMeTAD (135 nm)/Ag (100 nm). OPTICAL is a GPL optical simulation program written by Python, wxWindows, wxPython and Boa Constructor, which can be obtained from [numpy.scipy.org](http://numpy.scipy.org). Thickness of each layer was obtained by Step Profiler or SEM cross section.

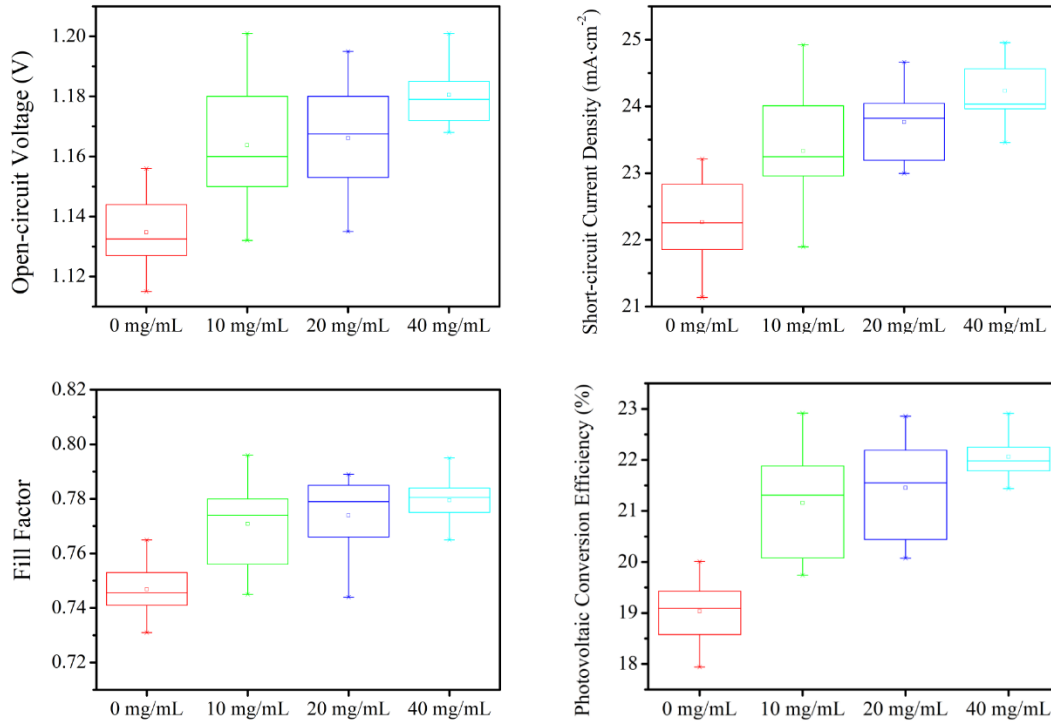

**Figure S1.** The data statistics of open-circuit voltage ( $V_{oc}$ ), short-circuit current density ( $J_{sc}$ ), fill factor (FF) and photovoltaic conversion efficiency (PCE) of device with different  $Cs_2CO_3$  concentrations, where the abscissas is the concentration of  $Cs_2CO_3$ .

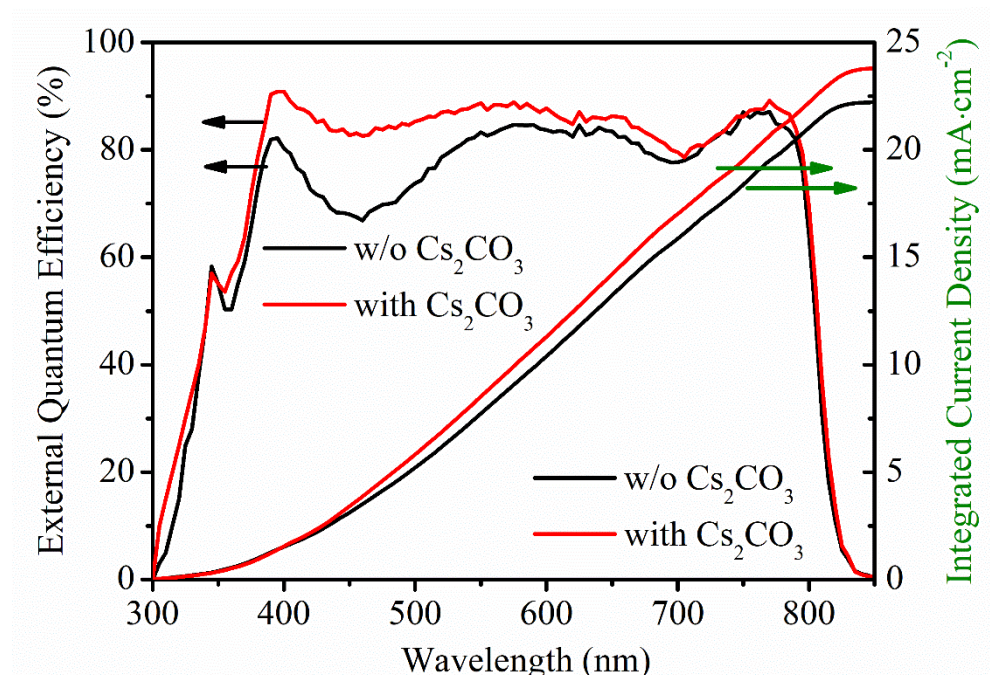

**Figure S2.** The EQE and  $J_{in}$  results of the devices with and without  $Cs_2CO_3$  modification.

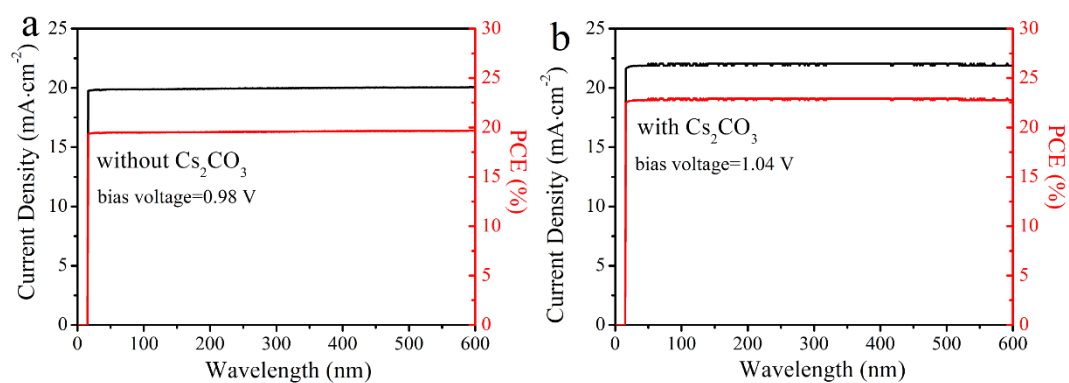

**Figure S3.** The stabilized photocurrent measurement at the maximum power point (MPP) of the device (a) without and (b) with  $Cs_2CO_3$  modification.

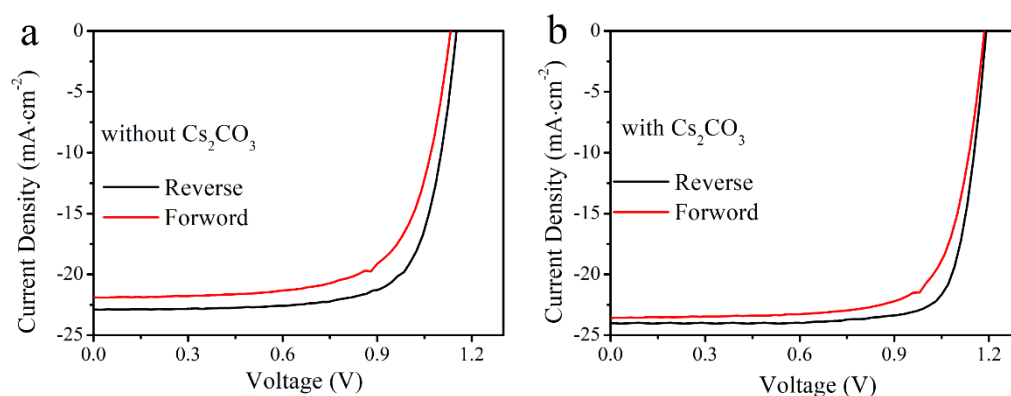

**Figure S4.** The hysteresis tests of the devices (a) without and (b) with  $\text{Cs}_2\text{CO}_3$  modification.

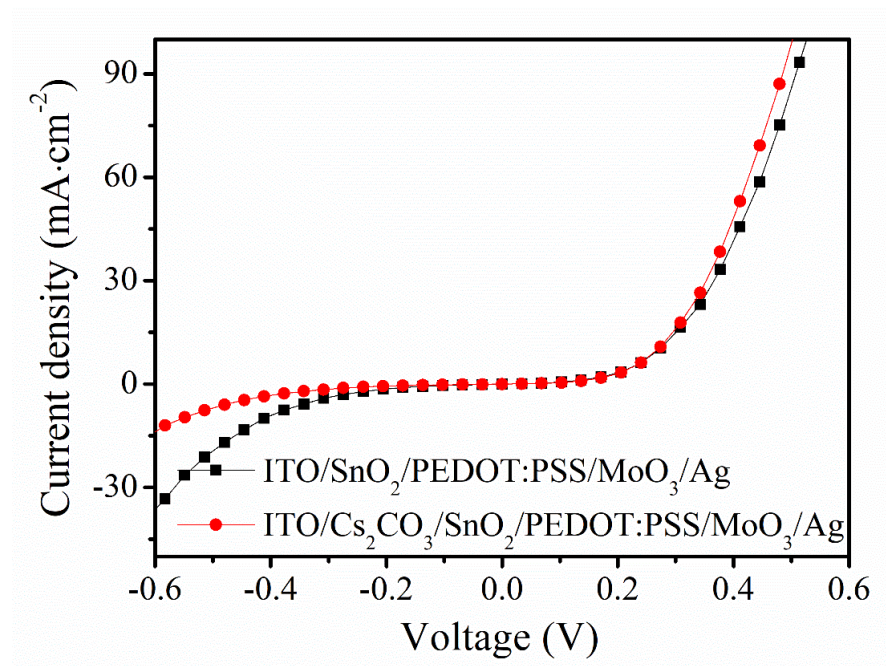

**Figure S5.** J-V curves of samples with the structure of ITO/ (with and without)  $\text{Cs}_2\text{CO}_3/\text{SnO}_2/\text{PEDOT:PSS}/\text{MoO}_3/\text{Ag}$ . The ITO is connected to the cathode of the source meter.

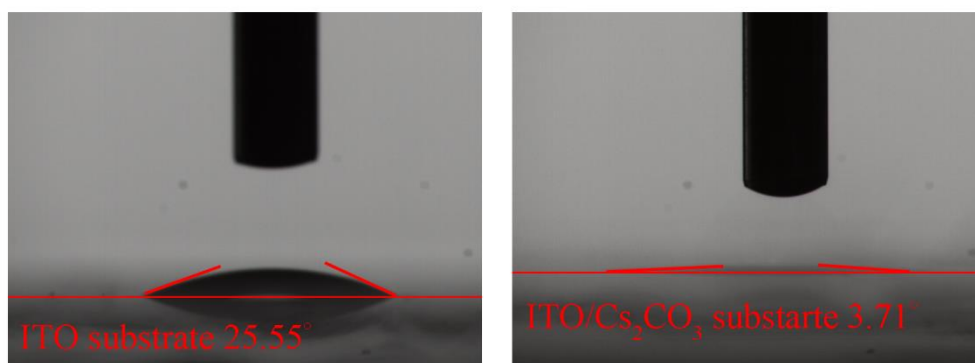

**Figure S6.** Contact angle test results of ITO and  $\text{ITO}/\text{Cs}_2\text{CO}_3$  substrate. The ITO substrate modified with  $\text{Cs}_2\text{CO}_3$  shows better wettability to  $\text{SnO}_2$  solution.

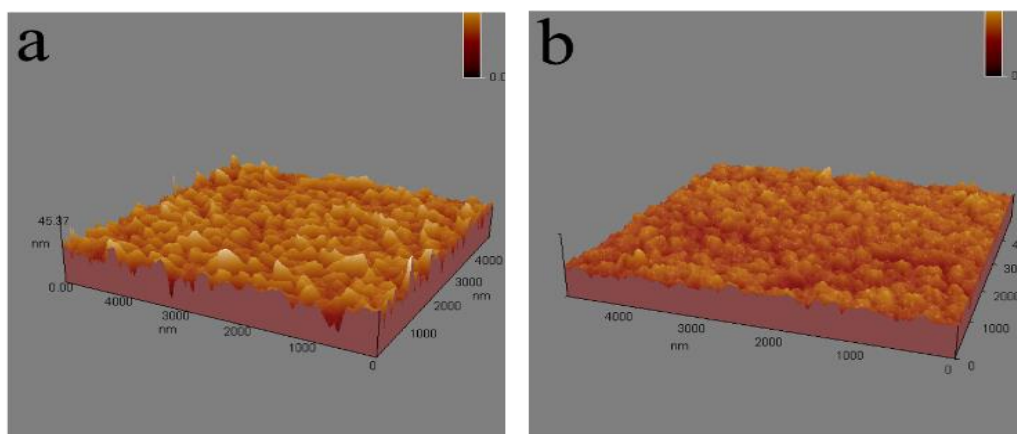



**Figure S7.** AFM results of SnO<sub>2</sub> film on (a) bare ITO and (b) Cs<sub>2</sub>CO<sub>3</sub>-modification ITO substrates. The SnO<sub>2</sub> film formed on ITO/Cs<sub>2</sub>CO<sub>3</sub> substrate shows a denser and smaller roughness (root mean square roughness,  $\sigma_{rms} \sim 1.3$  nm) when compared to that of bare ITO case ( $\sigma_{rms} \sim 3.7$  nm). It should be noted that the  $\sigma_{rms}$  here is extracted from the software provided by the instrument itself and the  $\sigma_{rms}$  given here is indicative only.

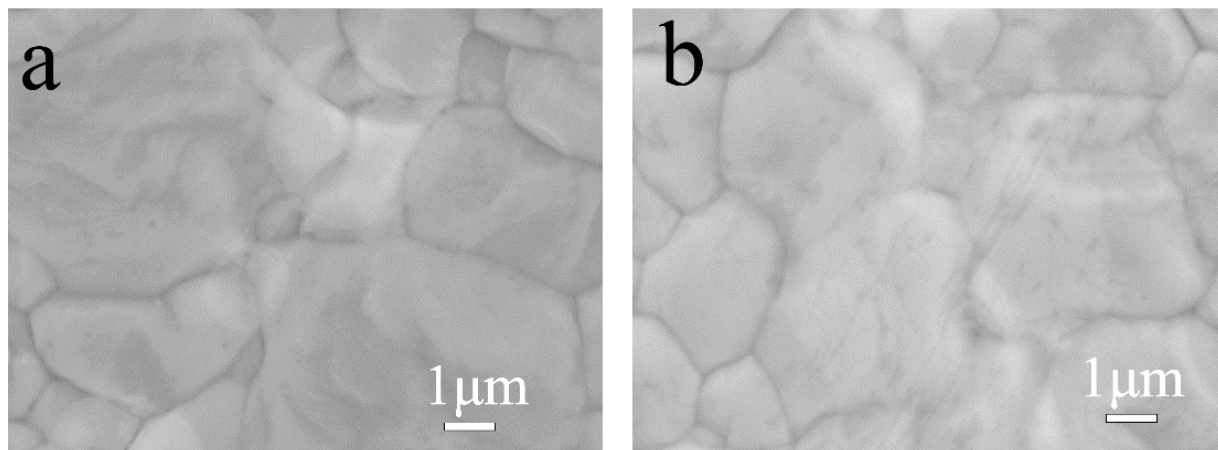

**Figure S8.** SEM images of the perovskite layer in the samples of (a) ITO/SnO<sub>2</sub>/perovskite and (b) ITO/Cs<sub>2</sub>CO<sub>3</sub>/SnO<sub>2</sub>/perovskite. The images show that the morphologies of the two samples are similar.

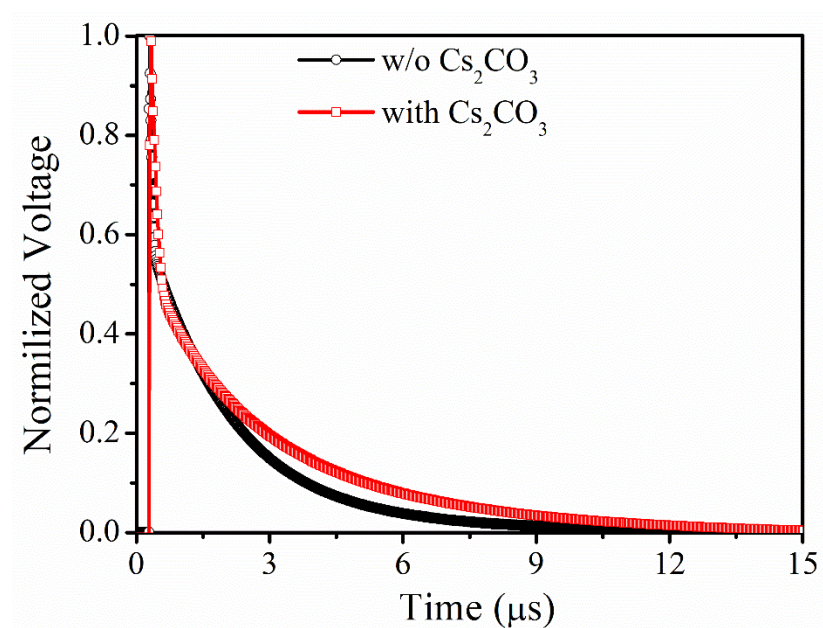

**Figure S9.** The TPV tests of the device with and without Cs<sub>2</sub>CO<sub>3</sub> modification.

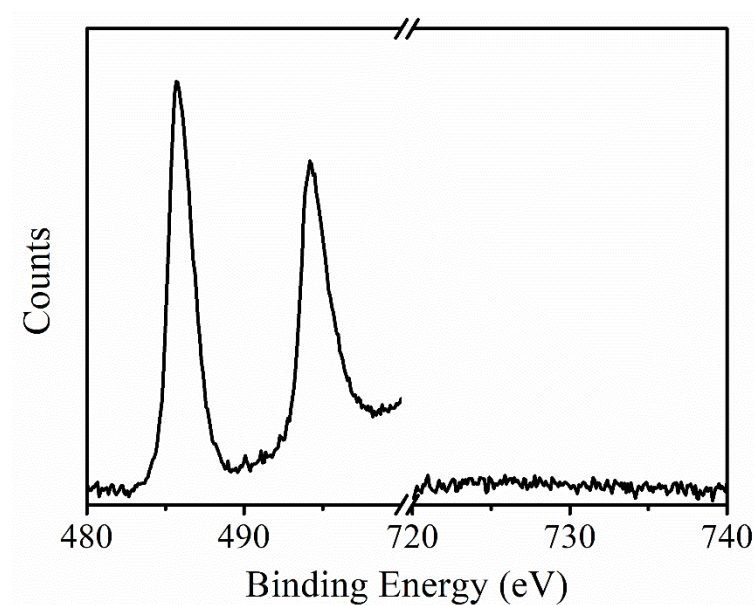

**Figure S10.** XPS tests on the surface of the device ITO/Cs<sub>2</sub>CO<sub>3</sub>/SnO<sub>2</sub>. The 485 and 494 eV peaks can be attributed to the Sn element in SnO<sub>2</sub>, while the 724 eV position of the Cs element does not show the peak position, which means that there is no Cs element on the surface of the ITO/Cs<sub>2</sub>CO<sub>3</sub>/SnO<sub>2</sub> device.

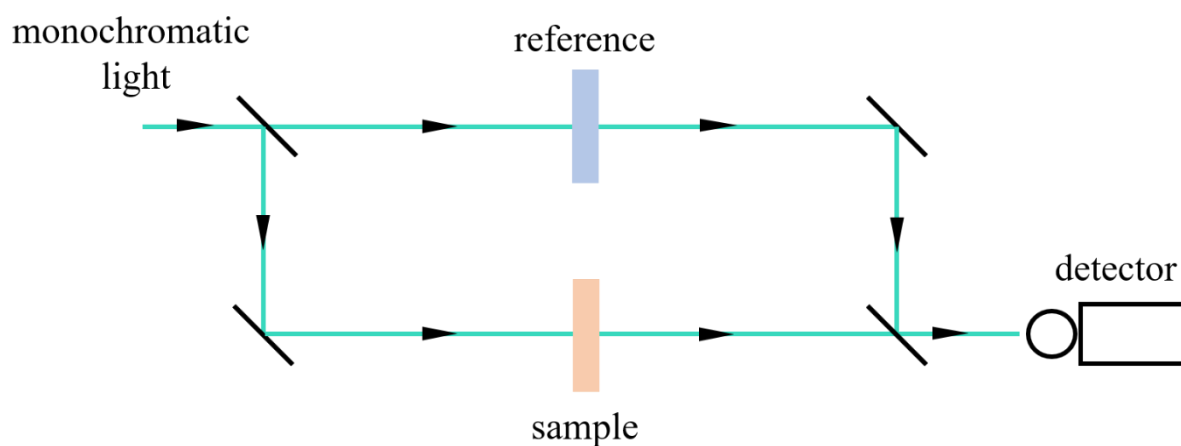

**Figure S11.** The optical path diagram when the transmittance change test is performed, where the reference is ITO or ITO/SnO<sub>2</sub>, and the samples are ITO/Cs<sub>2</sub>CO<sub>3</sub> and ITO/Cs<sub>2</sub>CO<sub>3</sub>/SnO<sub>2</sub>, respectively.

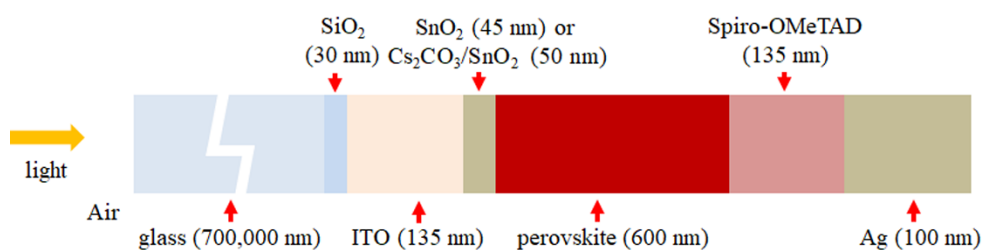

**Figure S12.** The device structure with or without Cs<sub>2</sub>CO<sub>3</sub> modification used in optical simulation.

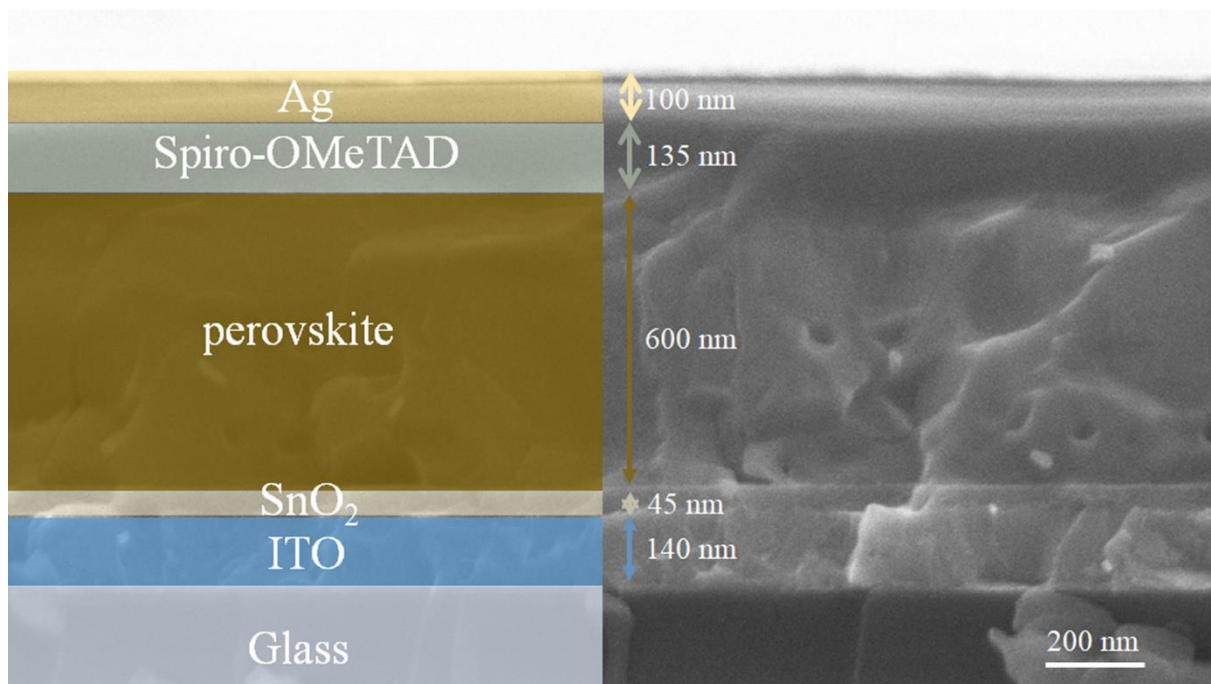

**Figure S13.** Cross-sectional SEM images of the device with structure ITO/SnO<sub>2</sub>/perovskite/Spiro-OMeTAD/Ag.

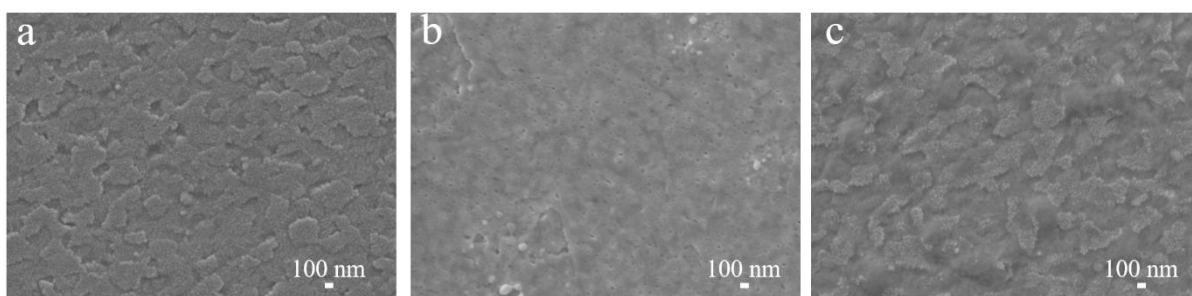

**Figure S14.** The SEM images of (a) ITO, (b) ITO/Cs<sub>2</sub>CO<sub>3</sub> and (c) ITO/Cs<sub>2</sub>CO<sub>3</sub> after deionized water washing.

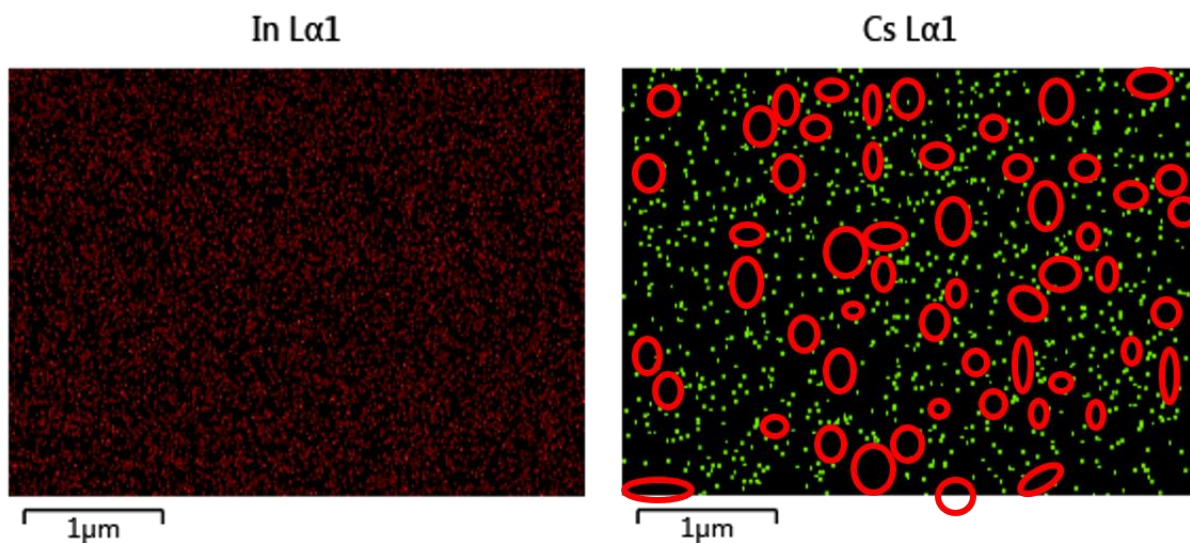

**Figure S15.** The EDS image of ITO/Cs<sub>2</sub>CO<sub>3</sub> after deionized water washing. The red circle circles the area without Cs element.
